# Supplementary material for: Romidepsin suppresses monosodium urate crystal-induced cytokine production through upregulation of suppressor of cytokine signaling 1 expression
Source: PubMed Central journal article supplement (PMC6366029; doi:10.1186/s13075-019-1834-x), 2019-02-06
Supplement: 13075_2019_1834_MOESM1_ESM.pdf [file 13075_2019_1834_MOESM1_ESM.pdf]

## Supplemental data

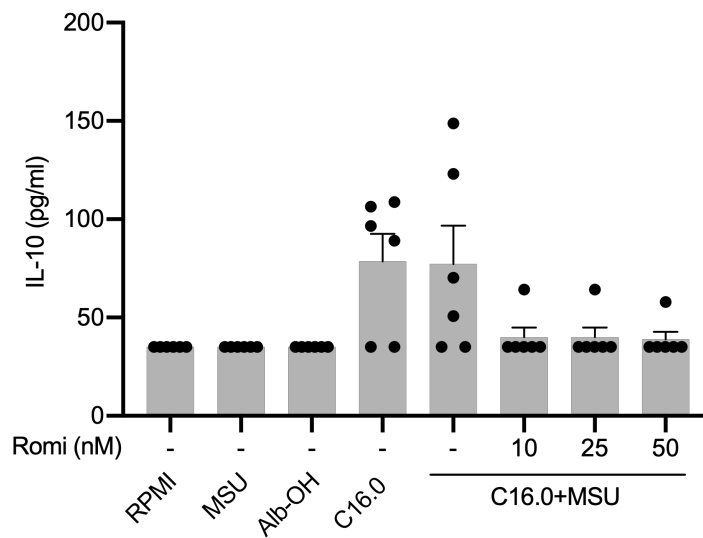

### Supplemental Figure 1. Effects of Romidepsin on C16.0+MSU-induced IL-10 production in human PBMCs

Freshly isolated PBMCs were pre-incubated with different concentrations of Romidepsin for 1 hour, after which cytokine production was induced via addition of a combination of 50  $\mu$ M palmitic acid (C16.0) and 300  $\mu$ g/mL monosodium urate crystals (MSU). The cells were cultured for 24 hours. IL-10 concentration was measured in the supernatant.
